# Supplementary material
Source: PubMed Central journal article supplement (PMC3293559)
Supplement: supp_M111.322461_jbc.M111.322461-1.pdf [file supp_M111.322461_jbc.M111.322461-1.pdf]

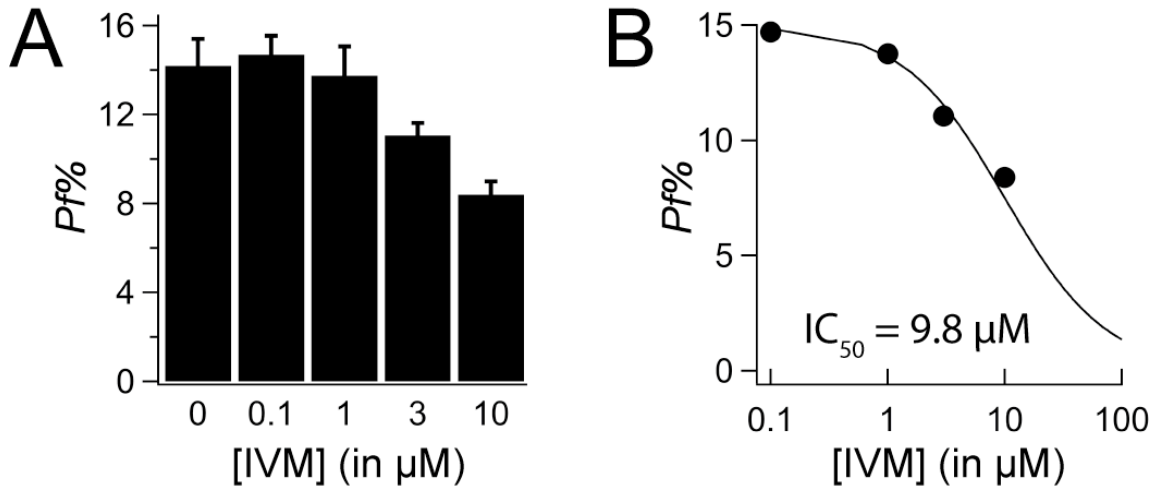

**Supplementary Figure 1. IVM concentration- *Pf*% inhibition curve.** Panel **A** shows the pooled data for the effect of different concentrations of IVM on hP2X4Rs. Panel **B** shows the concentration-response curve for the inhibition of *Pf*% by IVM. The solid black line is the best fit to the Hill Equation.
